# Supplementary material for: Two-step synthesis of a-NiCu(OH)2CO3/Na3NiCuCO3PO4: a battery-type electrode for pseudocapacitor applications
Source: Royal Society of Chemistry journal article supplement (doi:10.1039/d2nj04762d), 2023-01-01
Supplement: d2nj04762d1.pdf [file d2nj04762d1.pdf]

## Two-step synthesis of a-NiCu(OH)<sub>2</sub>CO<sub>3</sub>/Na<sub>3</sub>NiCuCO<sub>3</sub>PO<sub>4</sub>: A battery-type electrode for pseudocapacitor applications

Nishchith B S<sup>a</sup>, Yogesh Kalegowda<sup>a\*</sup>, Ashoka S<sup>b</sup>, Ganesan Sriram<sup>c</sup>, Mahaveer D Kurkuri<sup>c</sup>, Manjunatha Channegowda<sup>d,e</sup>

<sup>a</sup>Department of Physics, School of Engineering, Dayananda Sagar University, Bengaluru, India-560068

<sup>b</sup> Department of Chemistry, School of Applied Sciences, REVA University, Bengaluru, India-560064

<sup>c</sup>Centre for Nano and Material Sciences, JAIN University, Jain Global Campus, Bengaluru, India-562112

<sup>d</sup>Department of Chemistry, RV College of Engineering, Bengaluru, India-560059

<sup>e</sup>Visvesvaraya Technological University, Belagavi, India-590018

\*Corresponding author.

E-mail address: yogesh-phy@dsu.edu.in

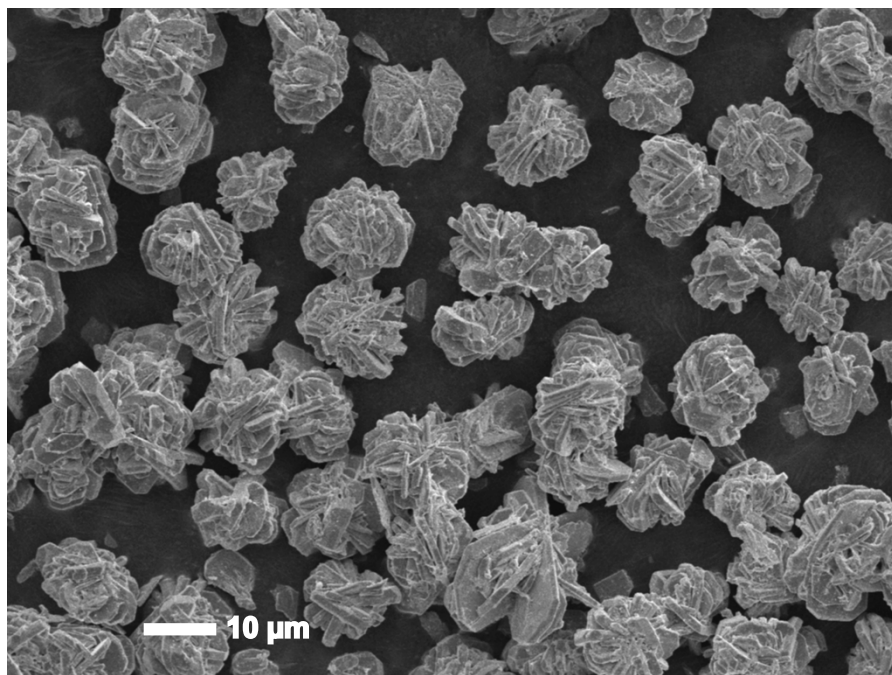

Fig. S1. FESEM image of a sample Ni:Cu-100:0 (Na<sub>3</sub>NiCO<sub>3</sub>PO<sub>4</sub>).

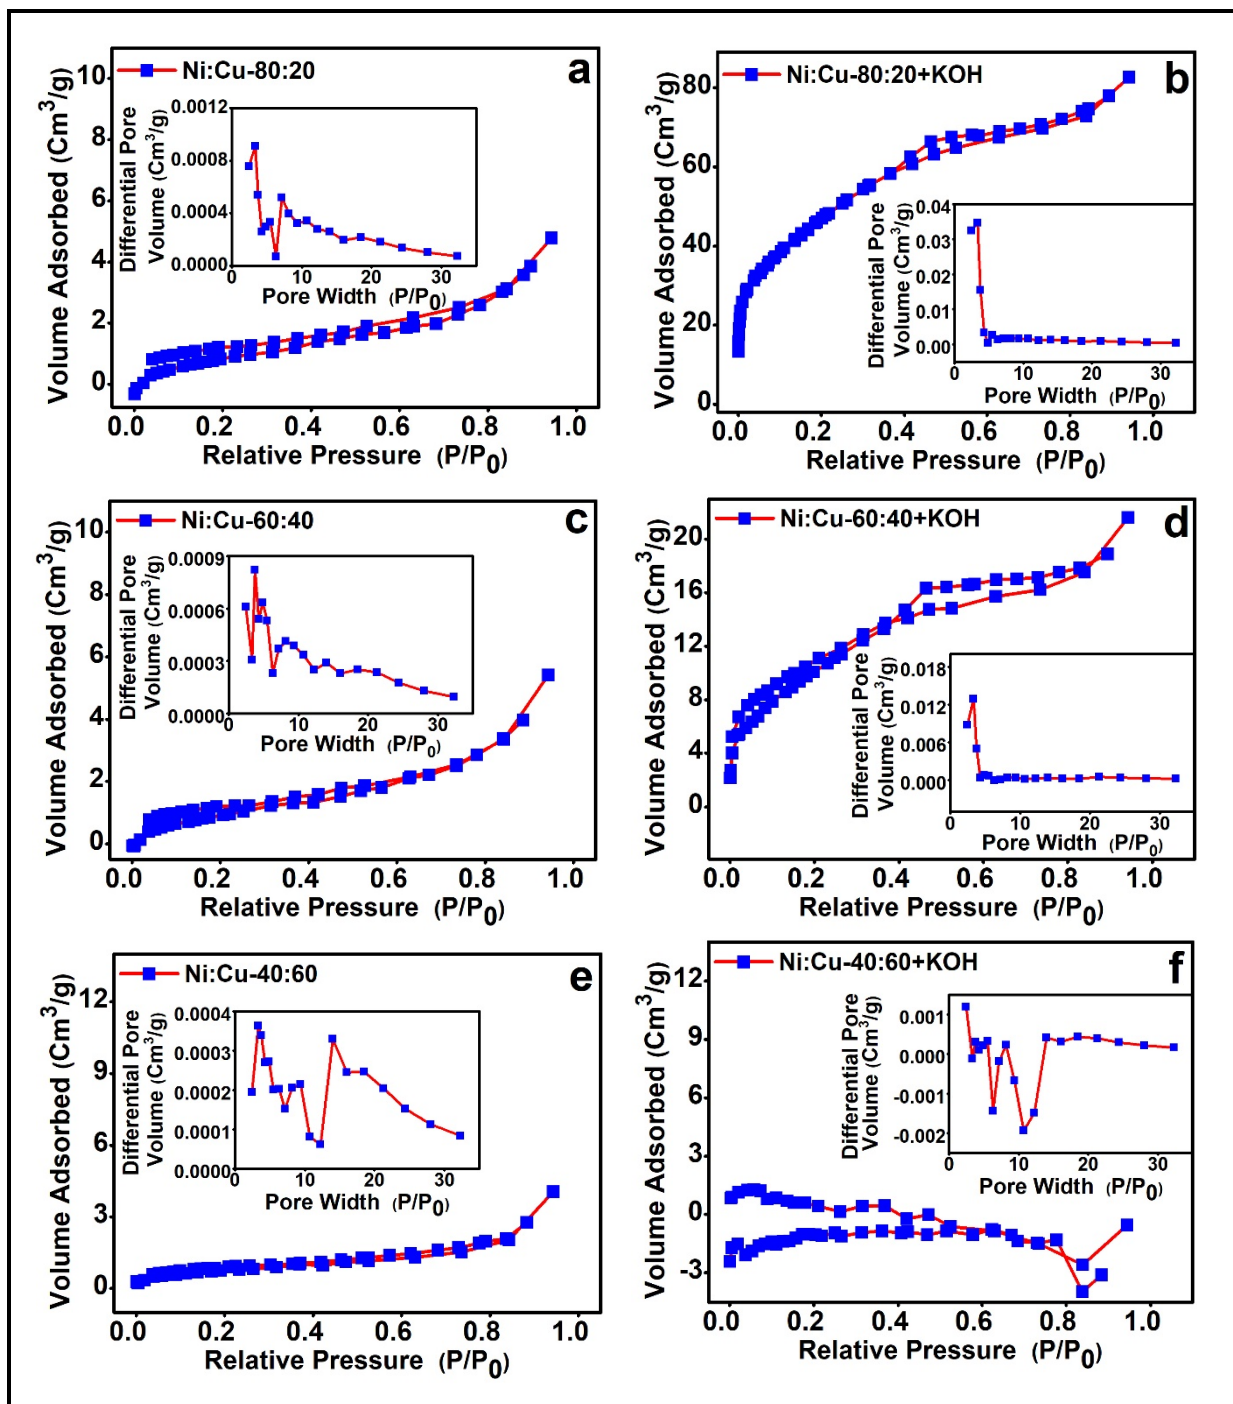

Fig. S2.  $\text{N}_2$  adsorption-desorption isotherms of the  $\text{Na}_3\text{NiCuCO}_3\text{PO}_4$  samples before and after KOH etching.

Table S1. Specific surface area, pore size and pore volume of the as-prepared and surface modified  $\text{Na}_3\text{NiCuCO}_3\text{PO}_4$  particles.

| Compound    | pore size (nm) |                  | pore volume ( $\text{cm}^3/\text{g}$ ) |                  |
|-------------|----------------|------------------|----------------------------------------|------------------|
|             | As prepared    | Surface modified | As prepared                            | Surface modified |
| Ni:Cu-100:0 | 15.02          | 4.09             | 0.010679                               | 0.1301           |
| Ni:Cu-80:20 | 7.02           | 2.99             | 0.007775                               | 0.0958           |
| Ni:Cu-60:40 | 8.19           | 3.37             | 0.008703                               | 0.0292           |
| Ni:Cu-40:60 | 9.10           | 0.00             | 0.006260                               | 0.0000           |

Table S2. The concentration of analyte in 1 M KOH electrolyte solution after  $\text{Na}_3\text{NiCuCO}_3\text{PO}_4$  (Ni:Cu-80:20) electrode immersed in KOH solution for different time.

| Technique                               | Element (in ppm) | Interaction with 1 M KOH solution |        |         |
|-----------------------------------------|------------------|-----------------------------------|--------|---------|
|                                         |                  | 20 min                            | 60 min | 120 min |
| ICP-OES                                 | P                | 34.7                              | 37.3   | 41.1    |
|                                         | Na               | 500                               | 543    | 587     |
|                                         | Ni               | 0.66                              | 0.89   | 0.93    |
|                                         | Cu               | 2                                 | 2.3    | 2.7     |
| IS 3025 (P-51) 2001 titration technique | C                | 1100                              | 1318   | 1212    |

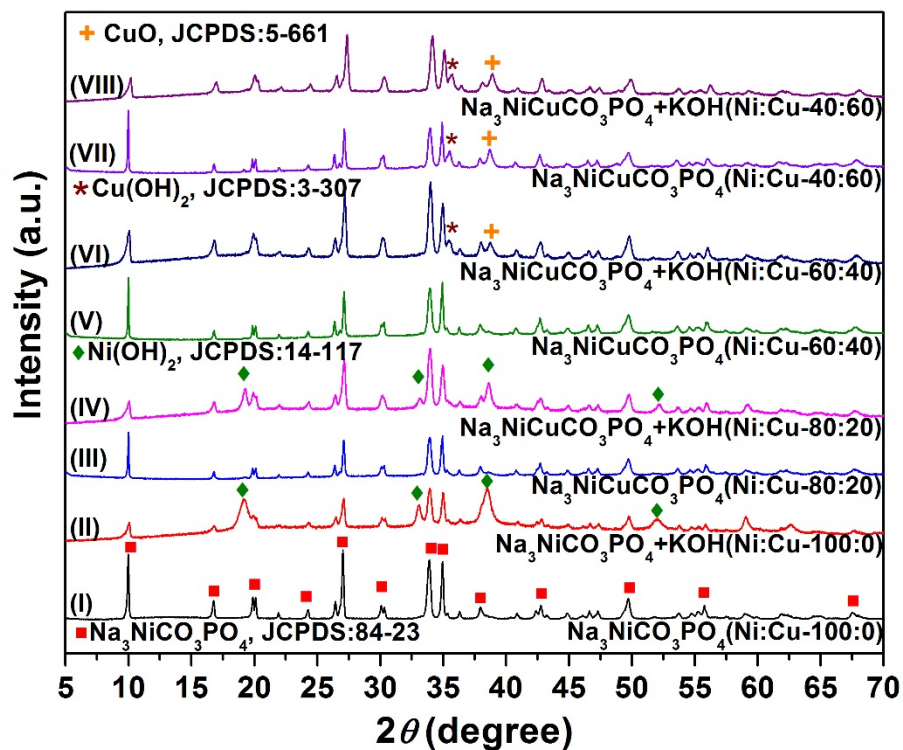

Fig. S3. Comparison of the XRD patterns of the  $\text{Na}_3\text{NiCuCO}_3\text{PO}_4$  before and after KOH etching.

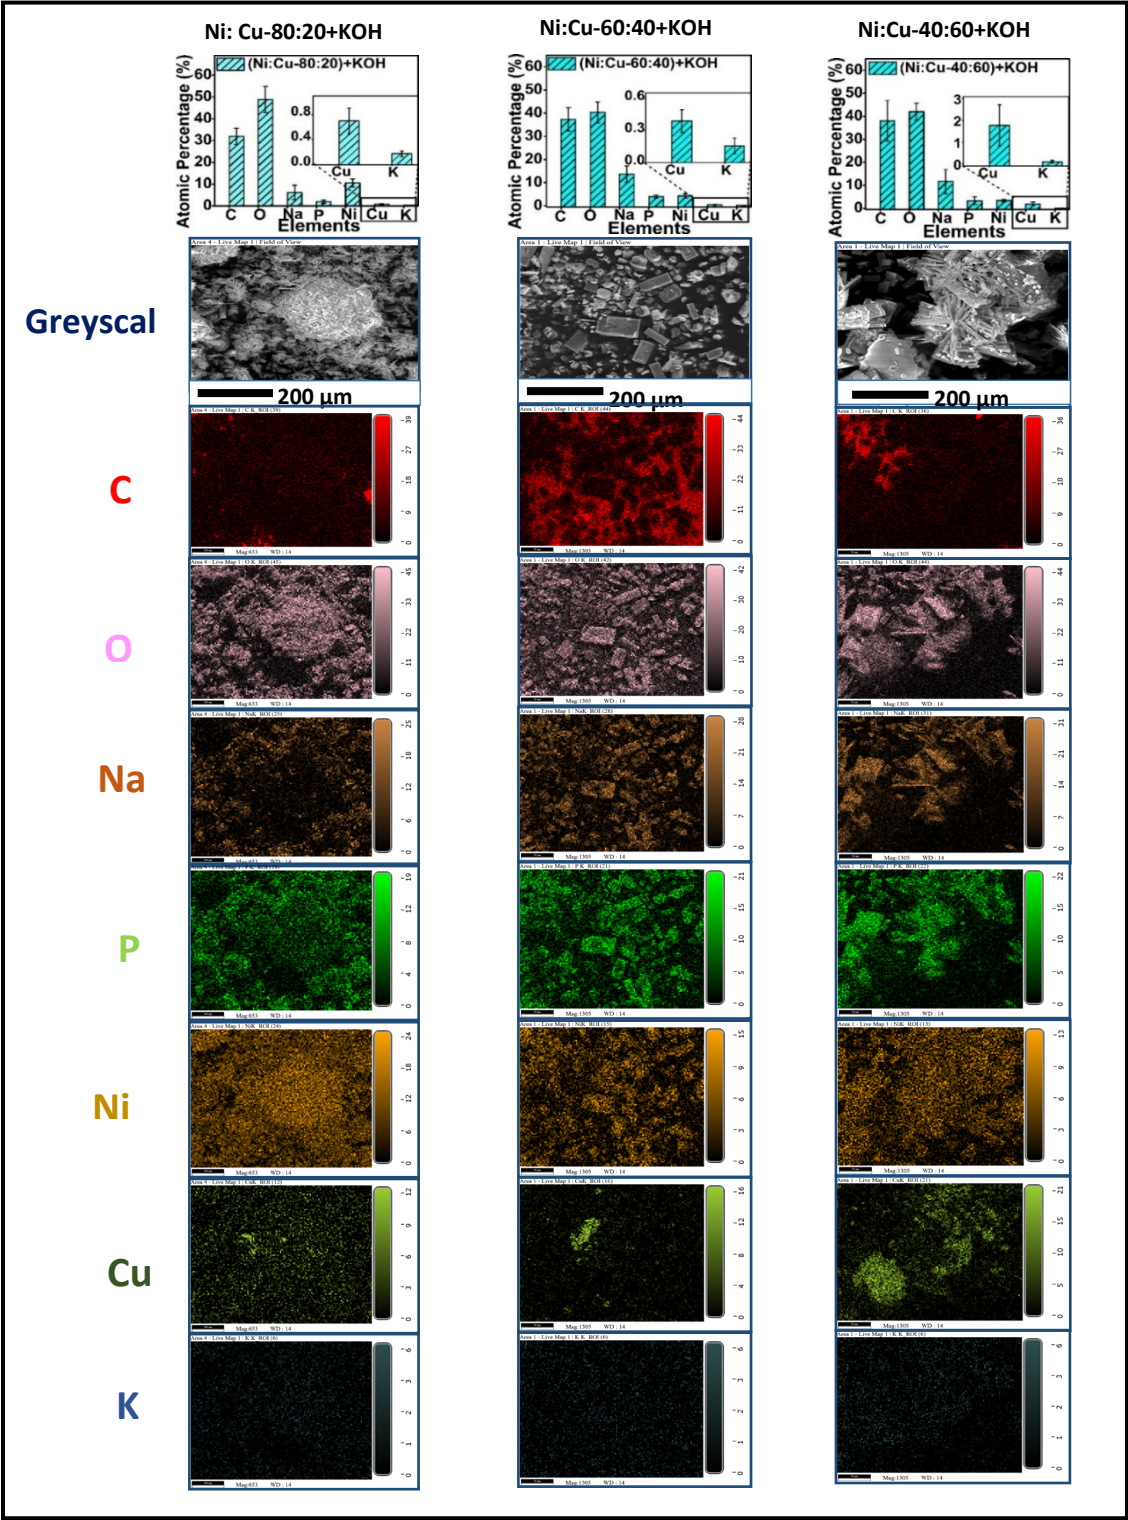

Fig. S4. FESEM elemental mapping of different elements at different electrochemical processing state.

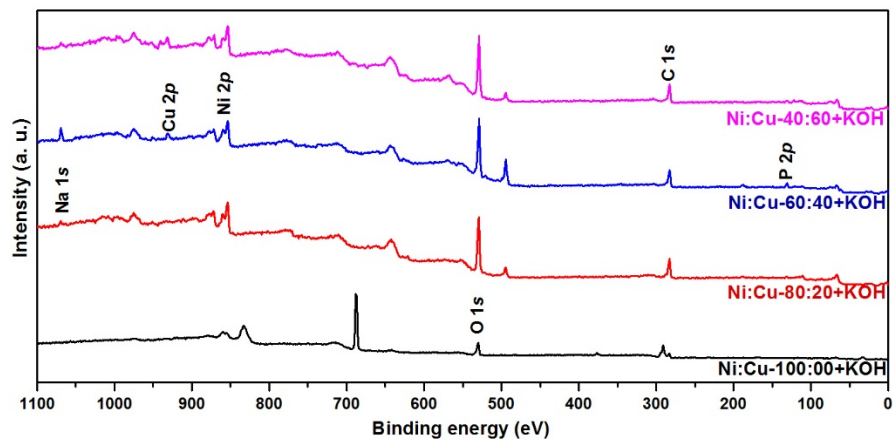

Fig. S5. The survey spectra acquired for  $\text{Na}_3\text{NiCuCO}_3\text{PO}_4$  samples after KOH etching.

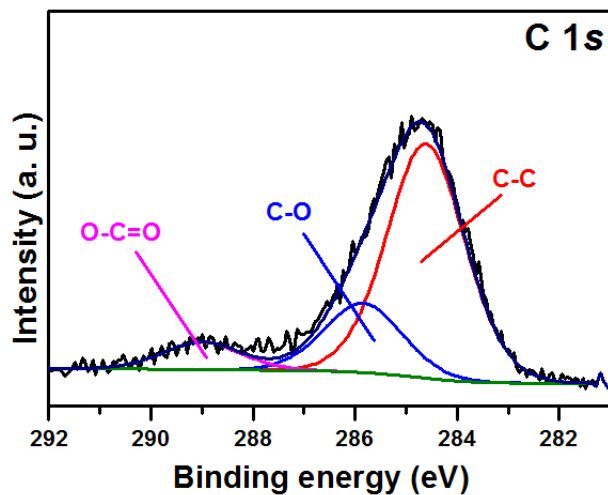

Fig. S6. High resolution C 1s spectrum of a Ni:Cu-80:20+KOH sample.

Table S3. XPS analysis data of various elements present in the KOH etched samples.

| Elements<br>(in at. %) | 1 M KOH etched samples |                 |                 |                 |
|------------------------|------------------------|-----------------|-----------------|-----------------|
|                        | Ni:Cu-100:00+KOH       | Ni:Cu-80:20+KOH | Ni:Cu-60:40+KOH | Ni:Cu-40:60+KOH |
| Na 1s                  | -                      | 0.85            | 3.21            | 0.98            |
| Ni 2p                  | 12.02                  | 5.25            | 7.45            | 7.51            |
| Cu 2p                  | -                      | 0.31            | 1.00            | 2.98            |
| C 1s                   | 19.63                  | 44.84           | 37.26           | 39.16           |
| P 2p                   | -                      | 2.47            | 6.42            | 3.52            |
| O 1s                   | 37.73                  | 46.28           | 44.66           | 45.87           |



Table S4. Spectral fitting parameters for Ni  $2p_{3/2}$ : Relative peak positions, FWHM and % contributions for Ni<sup>0</sup> and Ni<sup>2+</sup> GS envelopes for Ni:Cu-80:20+KOH sample.

| Species             | Charged State                   |              |                 | Total % |
|---------------------|---------------------------------|--------------|-----------------|---------|
|                     | Relative peak positions (in eV) | FWHM (in eV) | % contributions |         |
| Ni <sup>0</sup>     | 852.5                           | 1.0          | 0.27            | 5.6     |
|                     | 856.2                           | 2.5          | 4.06            |         |
|                     | 858.6                           | 1.8          | 1.27            |         |
| NiO                 | 853.7                           | 1.5          | 1.01            | 5.86    |
|                     | 855.4                           | 3.2          | 1.33            |         |
|                     | 860.8                           | 3.9          | 2.30            |         |
| Ni(OH) <sub>2</sub> | 863.9                           | 2.0          | 1.22            | 88.54   |
|                     | 854.8                           | 1.1          | 2.69            |         |
|                     | 855.7                           | 2.3          | 22.32           |         |
|                     | 857.6                           | 1.6          | 3.69            |         |
|                     | 860.3                           | 3.0          | 0.68            |         |
|                     | 861.5                           | 4.6          | 22.01           |         |
|                     | 866.3                           | 3.0          | 37.15           |         |

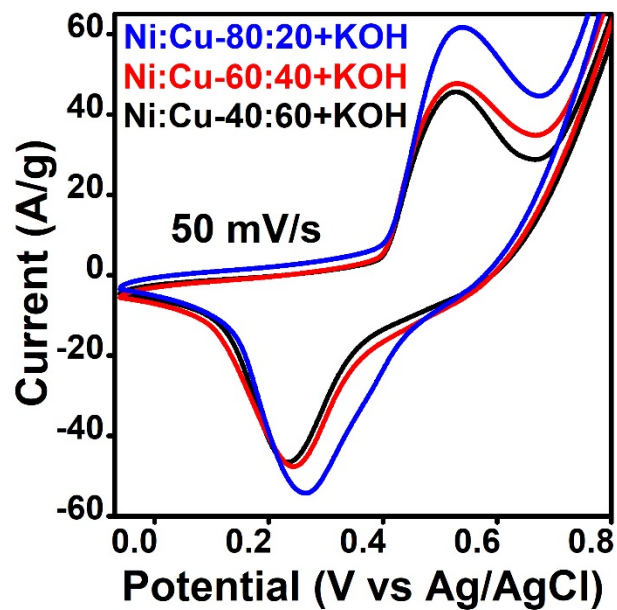

Fig. S7. CV profiles of KOH etched Na<sub>3</sub>NiCuCO<sub>3</sub>PO<sub>4</sub> samples in 1 M KOH solution obtained at 50 mV/s scan rate.

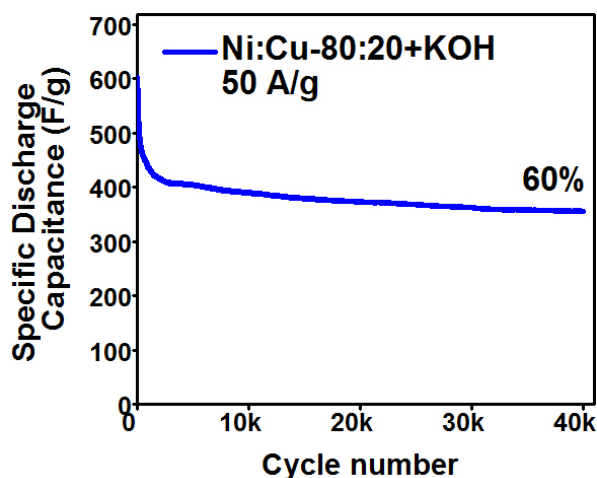

Fig. S8. The cycling stability of Ni:Cu-80:20+KOH in 1 M KOH electrolyte at 50 Ag<sup>-1</sup> for 40000 cycles.

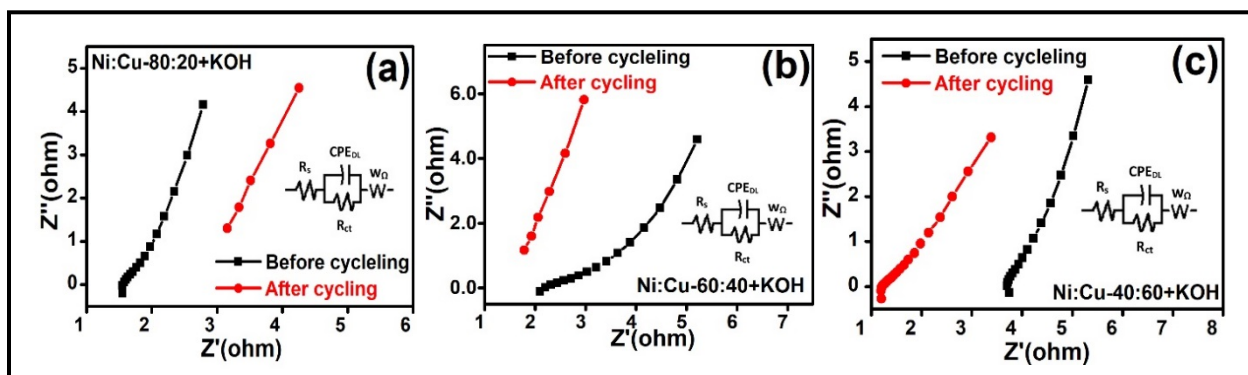

Fig. S9. (a) The Nyquist plots for the KOH etched samples before and after 15000 cycles at 10 Ag<sup>-1</sup>.

Table S5. EIS fitting results for different KOH etched Na<sub>3</sub>NiCuCO<sub>3</sub>PO<sub>4</sub> samples in 1 M KOH solution before charge-discharge cycling.

| Materials       | R <sub>s</sub> (Ωcm <sup>2</sup> ) | R <sub>ct</sub> (Ωcm <sup>2</sup> ) | W <sub>Ω</sub> (Ωcm <sup>2</sup> ) | CPE <sub>DL</sub> (μFcm <sup>-2</sup> ) |
|-----------------|------------------------------------|-------------------------------------|------------------------------------|-----------------------------------------|
| Ni:Cu-80:20+KOH | 1.50                               | 3.85                                | 0.01037                            | 94.85                                   |
| Ni:Cu-60:40+KOH | 2.32                               | 12.11                               | 0.003379                           | 153.9                                   |
| Ni:Cu-40:60+KOH | 3.59                               | 35.99                               | 0.007009                           | 98.81                                   |



Table S6. Comparison of electrochemical performance of Ni-Cu composite materials based asymmetric supercapacitors

| Electrode Materials                                                                           | Electrolyte | Specific Capacitance (F/g) at 1 A/g             | Cycles (5 A/g) | Retention (%) | Energy Density of SCs (Wh/Kg) | Power Density of SCs (W/Kg) | References |
|-----------------------------------------------------------------------------------------------|-------------|-------------------------------------------------|----------------|---------------|-------------------------------|-----------------------------|------------|
| NiCu(OH) <sub>2</sub> CO <sub>3</sub>                                                         | 6 M KOH     | 476                                             | 2000           | 88            | 48.55                         | 541                         | 1          |
| Ni-Cu oxides    rGO                                                                           | 1 M KOH     | 197 (0.5 A/g)                                   |                |               | 49                            | 1816                        | 2          |
| (Ni <sub>0.89</sub> Cu <sub>0.11</sub> ) <sub>2</sub> (OH) <sub>2</sub> CO <sub>3</sub>    AC | 2 M KOH     | 96.06                                           | 4000           | 70.8          | 21.7                          | 8407.4                      | 3          |
| NiCu- hybrid    AC                                                                            | 1 M KOH     | 2420 mC/cm <sup>2</sup> (2 mA/cm <sup>2</sup> ) |                |               | 420 μWh/cm <sup>2</sup>       | 2297 μW/cm <sup>2</sup>     | 4          |
| NiCu(OH) <sub>2</sub> CO <sub>3</sub>    AC                                                   | 2 M KOH     | 163.7 (0.6 A/g)                                 | 5000 (2 A/g)   | 88.8          | 19.5                          | 3789.5                      | 5          |
| NiCu(CO <sub>3</sub> )(OH) <sub>2</sub>    graphene                                           | 1 M KOH     | 758.9 mA h g <sup>-1</sup> (3 A/g)              | 5000 (3 A/g)   | 87.2          | 26.7                          | 2534                        | 6          |
| MoS <sub>2</sub> /NiCo(OH) <sub>2</sub> CO <sub>3</sub>    AC                                 | 2 M KOH     | 1296                                            | 2000 (1 A/g)   |               | 16.4                          | 375                         | 7          |
| Co/Ni hydroxide/CNT paper                                                                     | 6 M KOH     | 1497 (0.5 A/g)                                  | 5,000          | --            | -                             | -                           | 8          |
| PAN@NiCu(CO <sub>3</sub> )(OH) <sub>2</sub>    graphene                                       | 2 M KOH     | 870 mAh g <sup>-1</sup> (3 A/g)                 | 5000 (1 A/g)   | 90.1          | 90                            | 835                         | 9          |
| core/shell Na <sub>3</sub> NiCuCO <sub>3</sub> PO <sub>4</sub>                                | 1 M KOH     | 2647.9                                          | 40000          | 79            | 30.6                          | 1555                        | This work  |

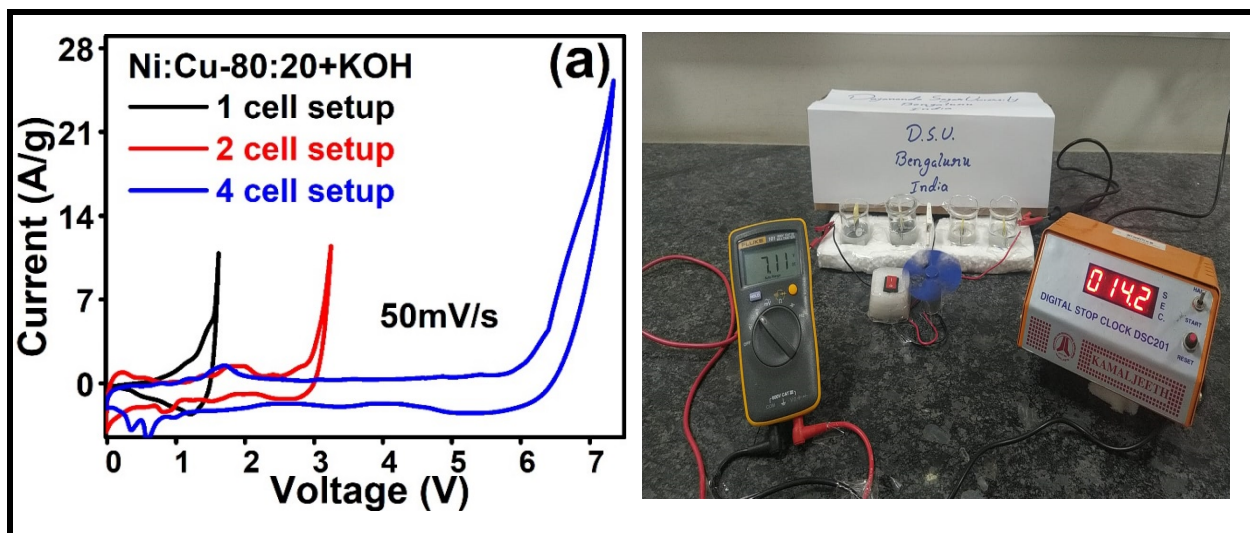

Fig. S10. (a) GCD curves of single, two and four SSCs in series at current density 1 A/g (b) photograph of tandem (four cells in series) SC powering the 6V DC motor fan.

## REFERENCES

1. X. Zheng, Y. Ye, Q. Yang, B. Geng and X. Zhang, Ultrafine nickel–copper carbonate hydroxide hierarchical nanowire networks for high-performance supercapacitor electrodes, *Chemical Engineering Journal*, 2016, **290**, 353-360.
2. L. Zhang and H. Gong, Unravelling the correlation between nickel to copper ratio of binary oxides and their superior supercapacitor performance, *Electrochimica Acta*, 2017, **234**, 82-92.
3. P. W. Yuan, S. H. Guo, S. Q. Gao, J. Wang, W. Q. Chen, M. Li, K. Y. Ma, N. Wang, F. Liu and J. P. Cheng, Influence of Ni/Cu ratio in nickel copper carbonate hydroxide on the phase and electrochemical properties, *Journal of Alloys and Compounds*, 2019, **780**, 147-155.
4. J. Zhu, L. Wei, Q. Liu and X. Kong, Room-temperature preparation of amorphous CuNi-hybrid nanorod array as a fast battery-type electrode for high performance supercapacitor, *Materials Chemistry and Physics*, 2020, **247**, 122786.

5. A. Bera, A. Kumar Das, A. Maitra, R. Bera, S. Kumar Karan, S. Paria, L. Halder, S. Kumar Si and B. Bhusan Khatua, Temperature dependent substrate-free facile synthesis for hierarchical sunflower-like nickel–copper carbonate hydroxide with superior electrochemical performance for solid state asymmetric supercapacitor, *Chemical Engineering Journal*, 2018, **343**, 44-53.
6. D. Lee, H. W. Lee, N. M. Shinde, J. M. Yun, S. Mathur and K. H. Kim, Synthesis of nickel–copper composite with controllable nanostructure through facile solvent control as positive electrode for high-performance supercapacitors, *Dalton Transactions*, 2020, **49**, 13123-13133.
7. A. Y. Chen, H. H. Liu, P. Qi, X. F. Xie, M. T. Wang and X. Y. Wang, Nanosheet-assembled 3D flower-like MoS<sub>2</sub>/NiCo(OH)<sub>2</sub>CO<sub>3</sub> composite for enhanced supercapacitor performance, *Journal of Alloys and Compounds*, 2021, **864**, 158144.
8. F. Tan, H. Chen, R. Yuan, X. Zhang and D. Chen, Co-Ni Basic Carbonate Nanowire/Carbon Nanotube Network With High Electrochemical Capacitive Performance via Electrochemical Conversion, 2021, **9**.
9. D. Lee, A. Verma, K. Lê, T. Fischer, K. H. Kim and S. Mathur, Hybrid nanostructured PAN@ NiCu (CO<sub>3</sub>)(OH)<sub>2</sub> composite for flexible high-performance supercapacitors, *Journal of Materials Research*, 2021, 1-15.
